# Supplementary material for: Identification of Wee1 as a target in combination with avapritinib for gastrointestinal stromal tumor treatment
Source: PubMed Central journal article supplement (PMC7934848; doi:10.1172/jci.insight.143474), 2021-01-25
Supplement: jciinsight-6-143474-s164.pdf [file jciinsight-6-143474-s164.pdf]

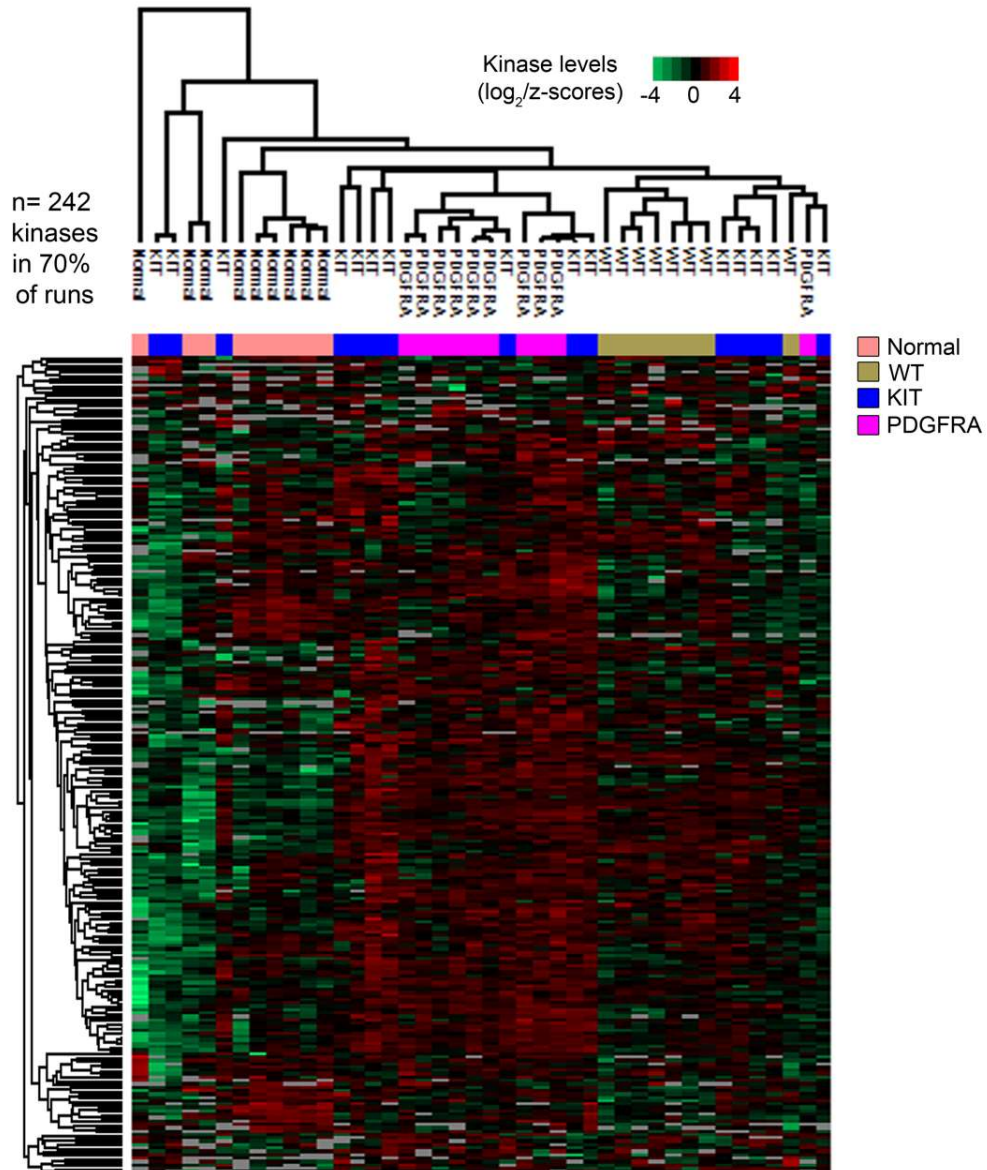

**Supplemental Figure 1.** Hierarchical clustering of kinase  $\log_2$  LFQ z-scores of WT, KIT-mutant, PDGFRA-mutant tumors and normal gastric tissues, as determined by MIB-MS.

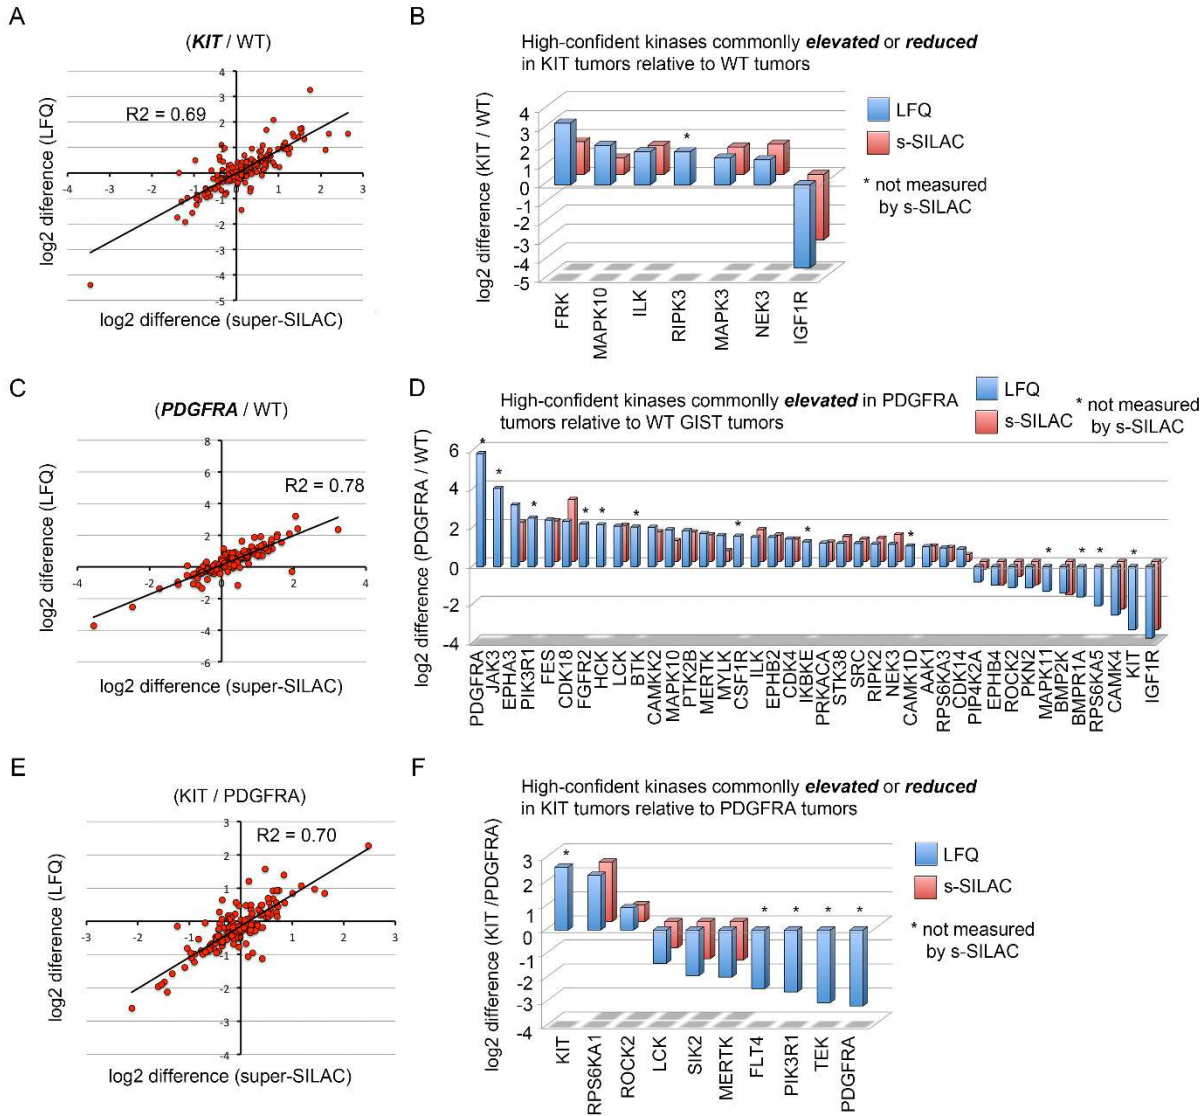

**Supplemental Figure 2. Defining kinome signatures of GIST tumor subtypes using MIB-MS profiling (A, C and E)** Scatterplot depicts the overlap in kinases elevated or reduced determined by LFQ or s-SILAC comparing (A) *KIT*-mutant vs WT, (C) *PDGFRA*-mutant vs WT and (E) *KIT*-mutant vs. *PDGFRA*-mutant. Regression analysis ( $R^2$ ) among quantitative methods was performed in Perseus Software. Differential expressed kinases commonly identified by LFQ and s-SILAC quantitation (FDR <0.05) are labeled. (B, D and F) Bar graph depicts high-confident kinases log<sub>2</sub> LFQ values overexpressed in (B) *KIT*-mutant vs. WT, (D) *PDGFRA*-mutant vs. WT or (F) *KIT*-mutant vs *PDGFRA*-mutant GIST primary tumors determined by LFQ and/or s-SILAC quantitation (FDR <0.05).

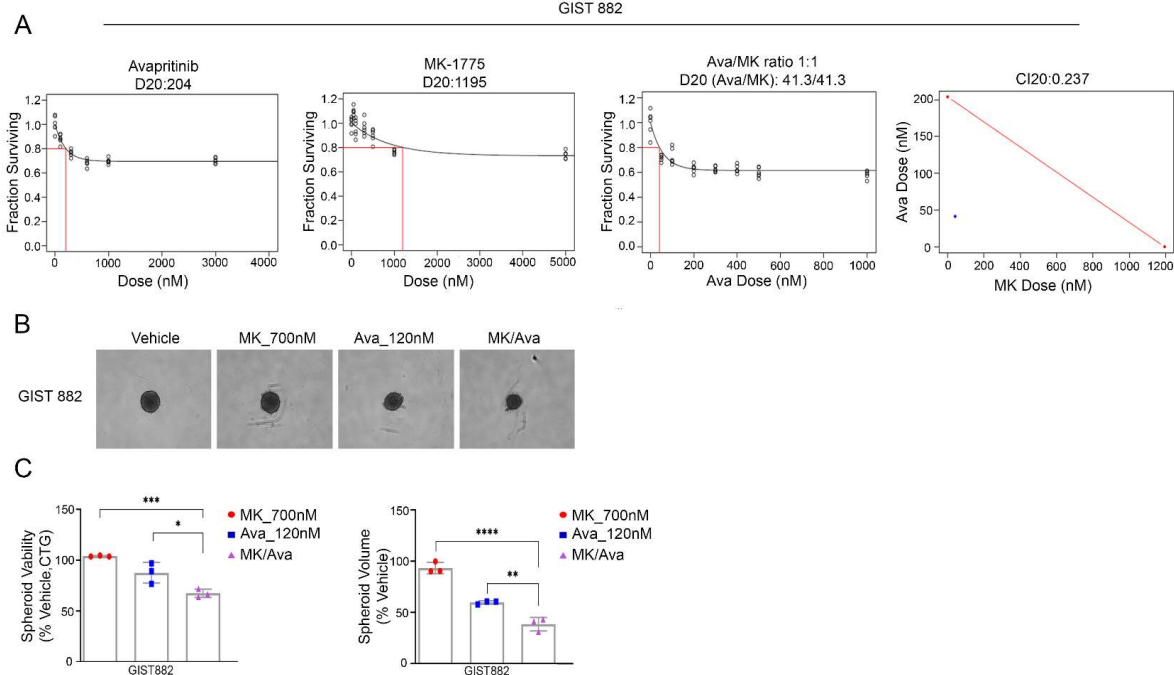

**Supplemental Figure 3.** MK-1775 and avapritinib have enhanced combination on in vitro GIST882 cell growth.

**(A) Panels 1 & 2,** Dose response curves for single agents (avapritinib, MK-1775) in GIST882 cell line. Red box indicates estimation of LD20 concentration for each single drug. **Panel 3,** Dose response curve representing increasing series of combinations in GIST882 cell line. Red box indicates estimation of LD20 concentration for combination of drugs. **Panel 4,** Single point (blue) on isobole curve for 20% kill. Red line indicates 50% isobole for strictly additive effect.  $CI_{LD20}$  in GIST882 is 0.0237 and is found within the synergistic triangle (region below the red line). **(B)** Representative images of GIST882 spheroids after 120-hour treatment at indicated concentrations. **(C, left panel)** Bars represent average viability  $\pm$  SEM after 120-hour treatment at indicated drug concentrations for GIST882 spheroids as a percentage of vehicle-treated spheroids. **(C, right panel)** Bars represent the average spheroid volume  $\pm$  SEM of GIST882 spheroids as a percentage of vehicle-treated spheroids. All spheroid data were analyzed using GraphPad Prism, with comparisons of treatment groups performed in one-way ANOVA and post hoc comparisons made using Bonferroni multiple comparisons method \*  $p = 0.0249$ , \*\*  $p = 0.0042$ , \*\*\*  $p = 0.0006$ , \*\*\*\*  $p < 0.0001$ .
